# Supplementary material for: Bifidobacterium adolescentis and Lactobacillus rhamnosus alleviate non-alcoholic fatty liver disease induced by a high-fat, high-cholesterol diet through modulation of different gut microbiota-dependent pathways
Source: Royal Society of Chemistry journal article supplement (doi:10.1039/c9fo02905b), 2020-01-01
Supplement: c9fo02905b1.pdf [file c9fo02905b1.pdf]

## Supplementary material

|              | week0     | week1     | week2     | week3       | week4       | week5        | week6        | week7        |
|--------------|-----------|-----------|-----------|-------------|-------------|--------------|--------------|--------------|
| <b>NC</b>    | 0.00±0.00 | 1.50±1.09 | 2.65±1.29 | 2.74±1.34** | 3.73±1.48** | 4.28±1.39*** | 5.18±1.44*** | 6.09±1.61*** |
| <b>HFHC</b>  | 0.00±0.00 | 2.38±0.42 | 3.90±0.66 | 4.70±0.73   | 5.93±0.95   | 6.77±1.03    | 8.12±1.19    | 9.21±1.27    |
| <b>RC</b>    | 0.00±0.00 | 2.63±0.62 | 3.94±0.79 | 4.39±1.05   | 5.45±0.72   | 5.92±1.01    | 6.87±1.15    | 7.78±1.17    |
| <b>SC</b>    | 0.00±0.00 | 1.62±0.40 | 2.88±0.61 | 3.49±0.68   | 4.67±1.12   | 5.04±0.82*   | 6.54±1.21    | 7.31±1.17*   |
| <b>LGG</b>   | 0.00±0.00 | 2.31±0.67 | 3.80±0.78 | 4.26±0.86   | 4.91±0.79   | 5.86±0.91    | 6.69±1.00    | 7.56±1.07    |
| <b>L7-1</b>  | 0.00±0.00 | 2.35±0.60 | 3.76±0.82 | 4.83±0.41   | 4.88±0.90   | 6.27±0.59    | 6.84±1.85    | 8.05±1.00    |
| <b>L10-1</b> | 0.00±0.00 | 2.15±0.68 | 3.48±1.03 | 4.77±1.18   | 5.25±1.42   | 6.56±1.61    | 7.84±1.83    | 8.63±1.71    |
| <b>BA3</b>   | 0.00±0.00 | 2.37±0.64 | 3.73±0.99 | 4.74±0.92   | 5.29±0.93   | 6.33±1.11    | 7.38±1.13    | 8.50±1.10    |
| <b>BA5</b>   | 0.00±0.00 | 2.48±1.38 | 3.89±1.31 | 5.11±1.12   | 5.41±1.59   | 6.44±1.46    | 7.36±1.65    | 8.33±1.78    |
| <b>Z25</b>   | 0.00±0.00 | 2.49±0.52 | 3.88±0.83 | 4.90±1.34   | 4.61±1.01   | 6.40±0.97    | 7.35±1.10    | 8.10±1.18    |

Table S1 The body weight gain of mice (week 0-week 7)

\*  $p < 0.05$ , \*\*  $p < 0.01$ , \*\*\*  $p < 0.001$

|              | week8        | week9        | week10       | week11       | week12       | week13        | week14        | week15        |
|--------------|--------------|--------------|--------------|--------------|--------------|---------------|---------------|---------------|
| <b>NC</b>    | 6.62±1.71*** | 6.88±1.69*** | 7.29±1.60*** | 7.83±1.69*** | 8.41±1.53*** | 8.65±1.77***  | 9.42±1.81***  | 9.82±1.83***  |
| <b>HFHC</b>  | 9.86±1.45    | 10.70±1.59   | 11.61±1.58   | 12.80±1.64   | 14.33±1.84   | 14.99±2.12    | 16.52±2.19    | 16.61±2.28    |
| <b>RC</b>    | 7.80±0.98*   | 8.53±1.17*   | 9.16±1.25*   | 9.81±1.48**  | 9.97±1.36*** | 10.88±1.45*** | 11.54±1.60*** | 11.73±1.47*** |
| <b>SC</b>    | 7.63±1.42*   | 8.58±1.41    | 9.05±1.69*   | 9.63±1.89**  | 11.21±2.31** | 11.41±2.34**  | 12.61±2.53**  | 12.49±2.59**  |
| <b>LGG</b>   | 7.87±1.33    | 8.67±1.30    | 9.47±1.37    | 10.40±1.68*  | 11.28±1.80** | 11.91±1.99*   | 12.84±2.05**  | 13.22±2.74*   |
| <b>L7-1</b>  | 8.50±0.96    | 9.04±1.87    | 10.21±0.90   | 11.06±1.12   | 11.91±1.34*  | 12.55±1.58    | 13.59±1.93*   | 14.10±2.09    |
| <b>L10-1</b> | 9.32±1.83    | 9.95±1.75    | 10.51±2.06   | 11.40±2.02   | 12.29±2.17   | 13.41±2.37    | 14.24±2.23    | 14.59±2.59    |
| <b>BA3</b>   | 8.91±1.25    | 9.74±1.39    | 10.08±1.35   | 11.28±1.62   | 12.14±1.61   | 12.86±1.91    | 13.73±2.18    | 14.24±2.28    |
| <b>BA5</b>   | 8.72±1.94    | 9.49±1.70    | 9.50±1.84    | 10.25±1.78*  | 11.33±1.98*  | 12.08±2.12*   | 12.53±2.07**  | 13.05±2.22*   |
| <b>Z25</b>   | 8.41±1.21    | 9.40±1.28    | 9.45±1.37*   | 10.80±0.98   | 11.15±0.94** | 11.98±1.10*   | 12.27±1.46*** | 13.13±1.43*   |

Table S2 The body weight gain of mice (week 8-week 15)

\*  $p < 0.05$ , \*\*  $p < 0.01$ , \*\*\*  $p < 0.001$

Table S3 The body weight gain of mice (week 16-week 23)

|              | week16       | week17        | week18        | week19        | week20        | week21        | week22        | week23        |
|--------------|--------------|---------------|---------------|---------------|---------------|---------------|---------------|---------------|
| <b>NC</b>    | 9.99±2.03*** | 10.01±1.97*** | 10.16±2.03*** | 10.60±2.21*** | 10.87±2.14*** | 10.42±2.29*** | 10.76±2.48*** | 10.90±2.42*** |
| <b>HFHC</b>  | 17.01±2.12   | 17.27±1.94    | 18.16±2.18    | 18.56±2.41    | 19.55±2.48    | 20.86±2.68    | 21.06±2.77    | 21.59±2.75    |
| <b>RC</b>    | 12.23±2.24** | 12.13±1.62*** | 12.24±1.77*** | 12.52±1.68*** | 13.20±2.07*** | 14.04±2.24*** | 14.13±2.12*** | 14.36±2.08*** |
| <b>SC</b>    | 12.89±2.71** | 13.31±2.74*   | 13.77±2.82**  | 14.19±2.84**  | 14.69±2.93**  | 15.75±3.12**  | 15.69±2.94**  | 15.91±2.86*** |
| <b>LGG</b>   | 13.10±2.71*  | 13.78±3.05*   | 14.34±3.43*   | 13.95±2.88**  | 15.18±3.11*   | 15.97±3.36**  | 16.12±2.98**  | 16.45±3.06**  |
| <b>L7-1</b>  | 14.54±1.95   | 15.12±2.22    | 15.24±2.47    | 15.59±2.48    | 16.96±2.61    | 16.89±2.82*   | 17.07±2.96*   | 17.38±2.89*   |
| <b>L10-1</b> | 15.21±2.66   | 15.73±2.80    | 15.98±3.00    | 16.67±2.91    | 17.80±3.31    | 17.56±3.09    | 17.93±2.80    | 18.35±2.90    |
| <b>BA3</b>   | 14.85±2.37   | 15.35±2.19    | 15.32±2.09    | 15.93±2.48    | 17.14±2.56    | 16.83±2.61*   | 17.39±2.42    | 17.55±2.43*   |
| <b>BA5</b>   | 13.72±2.33   | 14.49±2.24    | 14.95±2.18    | 15.19±2.27    | 16.72±2.19    | 16.63±2.15*   | 16.88±2.27*   | 17.21±2.25*   |
| <b>Z25</b>   | 13.43±1.53*  | 14.01±1.43*   | 14.15±1.67**  | 14.94±1.52*   | 16.01±1.76*   | 15.52±1.82**  | 15.90±2.15**  | 16.25±2.14*** |

\*  $p < 0.05$ , \*\*  $p < 0.01$ , \*\*\*  $p < 0.001$
